# Supplementary material
Source: publisher figshare collection journal article supplement (https://geolsoc.figshare.com/ndownloader/files/35156069)
Supplement: Supplementary file 1 [file 35156069]

## Sheet: Sheet1
Results_export_1	Results_export_2	Results_export_3
Results of Monte Carlo unmixing model
wghtings applied to PDPs and CDFs
number of grains in each trial=	N/A
trials=	10000
percent accepted trials=	1
Cross-correlation cutoff=	0
Kuiper V value cutoff=	1
KS D value cutoff=	1
Cross-correlation	0.808 +/- 0.027				Total Percent Contributions
Sample Names	Relative Contribution	Standard Deviation	Percent		Coahuila	Maya
PC03/Coahuila	0.726287	0.131423	72.6		73	23.4
La Joya/Coahuila	0.0396207	0.0425534	4
Santa Rosa/Maya	0.108472	0.0914131	10.8
Baldy Granites/Maya	0.028939	0.027422	2.9
Baldy Seds/Maya	0.0478562	0.0495566	4.8
Chicxulub/Maya	0.0185516	0.0174509	1.9
Macal Granites/Maya	0.0302741	0.0305084	3
Kuiper V value	0.159 +/- 0.008
Sample Names	Relative Contribution	Standard Deviation			Coahuila	Maya
PC03/Coahuila	0.671346	0.155675	67.1		74.4	25.5
La Joya/Coahuila	0.0734176	0.0880168	7.3
Santa Rosa/Maya	0.0864879	0.081891	8.6
Baldy Granites/Maya	0.0225102	0.0249445	2.3
Baldy Seds/Maya	0.106793	0.0943225	10.7
Chicxulub/Maya	0.0142669	0.0163313	1.4
Macal Granites/Maya	0.0251781	0.0282624	2.5
KS D value	0.095 +/- 0.008
Sample Names	Relative Contribution	Standard Deviation
PC03/Coahuila	0.811562	0.129724
La Joya/Coahuila	0.0262569	0.0316332
Santa Rosa/Maya	0.0570291	0.0741935
Baldy Granites/Maya	0.0135523	0.0147165
Baldy Seds/Maya	0.0676649	0.0892052
Chicxulub/Maya	0.00981489	0.0117576
Macal Granites/Maya	0.0141203	0.0185815
